# Supplementary material for: Evaluation of Modern Approaches for the Assessment of Dietary Carotenoids as Markers for Fruit and Vegetable Consumption
Source: MDPI journal article supplement (doi:10.3390/nu15071665), 2023-03-29
Supplement: s1 [file s1]

Supplemental Table S1: Behavioural effects of daily-app usage (n=21)

| <i>Did the App-usage have an influence on your daily...</i> | <i>Yes, increased</i> | <i>Yes, decreased</i> | <i>No impact</i> |
|-------------------------------------------------------------|-----------------------|-----------------------|------------------|
| <i>...F/V consumption, % (n)</i>                            | 38.1 (10)             | 0 (0)                 | 61.9 (12)        |
| <i>...Stress level, % (n)</i>                               | 19.0 (4)              | 4.8 (1)               | 76.2 (16)        |
| <i>...Physical activity, % (n)</i>                          | 14.3 (3)              | 0 (0)                 | 85.7 (18)        |
