# Supplementary material for: Evaluation of Modern Approaches for the Assessment of Dietary Carotenoids as Markers for Fruit and Vegetable Consumption
Source: MDPI journal article supplement (doi:10.3390/nu15071665), 2023-03-29
Supplement: s1 [file s1]

## **Food list App-based short dietary record**

### **Vegetables:**

Tomatoes, red, ripe, raw, year-round average  
Tomatoes, red, ripe, cooked  
Tomatoes, red, ripe, canned,  
Tomatoes, sun-dried  
Peppers, sweet, red, raw  
Peppers, sweet, red, cooked,  
Peppers, sweet, yellow, raw  
Peppers, sweet, yellow, cooked  
Peppers, sweet, green, raw  
Peppers, sweet, green, cooked  
Peppers, hot chili, red, raw  
Carrots, raw  
Carrots, cooked  
Carrots, canned  
Sweet potato, cooked, baked in skin  
Pumpkin, raw  
Pumpkin, cooked  
Pumpkin, canned  
Corn, sweet, yellow, raw  
Corn, sweet, yellow, cooked  
Corn, sweet, yellow, canned  
Peas, green, raw  
Peas, green, cooked  
Peas, green, canned  
Cucumber, peeled, raw  
Pickles, cucumber, sour  
Broccoli, raw  
Broccoli, cooked  
Arugula, raw  
Lettuce, iceberg  
Lettuce, cos or romaine, raw  
Lettuce, butterhead, raw  
Lettuce, red leaf (lollo rosso), raw  
Lettuce, green leaf, raw  
Lettuce, endivie, raw  
Spinach, raw  
Spinach, cooked  
Kale, raw  
Kale, cooked  
Collards, raw  
Collards, cooked  
Cabbage, red, raw  
Cabbage, red, cooked, boiled, drained, without salt

**Fruits:**

Oranges, raw, all commercial varieties  
Tangerines, (mandarin oranges), raw  
Grapefruit, raw, pink and red  
Mangos, raw  
Mango, dried, sweetened  
Apricots, raw  
Apricots, dried,  
Melons, cantaloupe, raw  
Watermelon, raw  
Papayas, raw  
Nectarines, raw  
Cherries, sour, red, raw  
Passion-fruit, (granadilla), purple, raw  
Persimmons, raw  
Sea buckthorn, raw

**Juices**

Orange juice, canned, unsweetened  
Tomato juice, canned,  
Carrot juice, canned  
Multivitamin juice (mainly known and consumed in Germany)  
Acerola juice, raw  
Sea buckthorn juice

**Processed tomato products**

Tomato soup, condensed  
Tomato, canned, sauce  
Tomato, canned, paste  
Catsup  
Pizza  
Pasta with tomato sauce
